# Supplementary material for: Prevalence of abnormal urinary cadmium and risk of albuminuria as a primary bioindicator for kidney problems among a healthy population
Source: PeerJ. 2021 Aug 19;9:e12014. doi: 10.7717/peerj.12014 (PMC8380425; doi:10.7717/peerj.12014)
Supplement: Supplemental Information 1 [file peerj-09-12014-s001.xlsx]

## Sheet: Sheet1
Code Number	Area	Gender	Ethnicity	Age (Years)	Highest Education Background	Working Status	Monthly Household Income (RM)	Duration of staying in Kepong (Years)	Diabetic	Random Glucose Level (mmol/L)	Hypertensive	Systolic Blood Pressure (mmHg)	Diastolic Blood Pressure (mmHg)	Dyslipidemia	Smoking Status	Body Mass Index (kg/m²)	Urine Cadmium (µg/L )	Albumin-Creatinine Ratio (ACR) (mg/g)
031	Segambut	Female	Indian	49	Secondary	Working	2500	48	No	6.6	No	97	58	No	Not smoking	26.5	0.84	60
063	Segambut	Female	Indian	27	Secondary	Working	1200	19	No	4.8	No	108	68	No	Not smoking	20.3	1.41	75
070	Segambut	Female	Indian	37	Secondary	Working	3800	20	No	5.1	No	121	84	No	Not smoking	32.3	0.49	20
127	Batu	Male	Malay	50	Secondary	Working	5000	25	No	6.1	No	139	85	No	Not smoking	24.1	0.71	20
079	Segambut	Female	Malay	33	Secondary	Working	1300	10	No	5.7	No	117	68	No	Not smoking	22	0.95	60
085	Segambut	Female	Malay	36	Secondary	Working	600	10	No	5.9	No	86	54	No	Not smoking	20.9	2.15	15
086	Segambut	Female	Malay	46	Secondary	Working	1300	20	No	6.3	No	130	80	No	Not smoking	53.3	6.31	75
172	Segambut	Female	Malay	56	Secondary	Working	3200	32	No	5.8	No	132	87	No	Not smoking	30	1.66	15
178	Segambut	Female	Malay	32	Secondary	Working	2900	10	No	6.4	No	136	80	No	Not smoking	19.7	0.57	20
179	Segambut	Female	Malay	47	Secondary	Working	4000	30	No	6.5	No	132	61	No	Not smoking	29.4	2.17	15
053	Kepong	Male	Malay	46	Primary	Working	1075	20	No	7.3	No	120	70	No	Not smoking	38.3	0.91	20
236	Batu	Female	Chinese	45	Tertiary	Working	2500	30	No	9	No	120	80	No	Not smoking	24.3	1.73	20
021	Kepong	Female	Chinese	46	Tertiary	Working	1500	26	No	6.5	No	118	87	No	Not smoking	34.7	0.81	20
098	Segambut	Female	Chinese	38	Tertiary	Working	12000	37	No	6.9	No	108	82	No	Not smoking	27.8	1.08	20
001	Kepong	Female	Indian	37	Tertiary	Working	20000	5	No	5.6	No	110	70	No	Not smoking	18.8	0.71	800
038	Segambut	Female	Indian	52	Tertiary	Working	3000	30	No	5.8	No	104	75	No	Not smoking	23.1	1.56	10
088	Segambut	Female	Indian	52	Tertiary	Working	1000	10	No	6.9	No	104	70	No	Not smoking	22.6	3.08	40
121	Batu	Male	Malay	33	Tertiary	Working	5000	32	No	5.1	No	117	80	No	Not smoking	29.8	1.18	80
128	Batu	Male	Malay	36	Tertiary	Working	4500	15	No	7.2	No	139	87	No	Not smoking	32.6	1.04	15
141	Batu	Male	Malay	25	Tertiary	Working	1000	23	No	5.8	No	136	75	No	Not smoking	25.7	1.26	15
144	Batu	Male	Malay	37	Tertiary	Working	3400	13	No	7.7	No	115	70	No	Not smoking	29.2	0.83	15
210	Batu	Male	Malay	32	Tertiary	Working	4000	31	No	6.3	No	123	71	No	Not smoking	25.4	0.77	20
003	Kepong	Male	Malay	31	Tertiary	Working	3900	5	No	6.9	No	121	77	No	Not smoking	30.6	0.86	15
013	Kepong	Male	Malay	30	Tertiary	Working	10000	20	No	6.5	No	130	70	No	Not smoking	26.4	0.7	15
015	Kepong	Male	Malay	35	Tertiary	Working	9000	6	No	5.2	No	135	88	No	Not smoking	27.1	0.33	10
221	Kepong	Male	Malay	58	Tertiary	Working	9000	20	No	5.6	No	129	81	No	Not smoking	24.5	0.8	15
225	Kepong	Male	Malay	36	Tertiary	Working	5000	7	No	5.8	No	107	79	No	Not smoking	28.7	0.9	20
097	Segambut	Male	Malay	28	Tertiary	Working	6500	20	No	6.3	No	117	85	No	Not smoking	36.1	0.73	20
220	Batu	Female	Malay	50	Tertiary	Working	10000	49	No	6.8	No	131	77	No	Not smoking	30.4	1.76	40
002	Kepong	Female	Malay	33	Tertiary	Working	4500	10	No	5.9	No	105	70	No	Not smoking	28.1	0.64	80
228	Kepong	Female	Malay	47	Tertiary	Working	5000	20	No	6.1	No	119	84	No	Not smoking	33.1	1.06	10
035	Segambut	Female	Malay	29	Tertiary	Working	2000	28	No	5.2	No	120	80	No	Not smoking	25.8	0.26	20
118	Segambut	Female	Malay	29	Tertiary	Working	2000	28	No	5.2	No	109	69	No	Not smoking	17.6	0.42	20
157	Segambut	Female	Malay	28	Tertiary	Working	10000	27	No	4.9	No	99	81	No	Not smoking	18.1	1.82	10
158	Segambut	Female	Malay	47	Tertiary	Working	6000	20	No	6.4	No	130	80	No	Not smoking	26.1	0.27	10
165	Segambut	Female	Malay	39	Tertiary	Working	3000	20	No	6.5	No	125	64	No	Not smoking	31.2	0.92	10
169	Segambut	Female	Malay	36	Tertiary	Working	8000	35	No	5.5	No	126	81	No	Not smoking	31.6	1.1	5
171	Segambut	Female	Malay	34	Tertiary	Working	3500	10	No	7.4	No	113	83	No	Not smoking	23.5	1.75	15
173	Segambut	Female	Malay	30	Tertiary	Working	1000	29	No	5.2	No	124	72	No	Not smoking	31.6	0.65	10
175	Segambut	Female	Malay	41	Tertiary	Working	3000	16	No	5.2	No	120	68	No	Not smoking	27.5	1.1	15
176	Segambut	Female	Malay	29	Tertiary	Working	8000	6	No	5.7	No	103	78	No	Not smoking	34.7	0.84	20
177	Segambut	Female	Malay	36	Tertiary	Working	10000	10	No	5.3	No	113	78	No	Not smoking	17	0.97	10
180	Segambut	Female	Malay	30	Tertiary	Working	4000	29	No	4.5	No	111	73	No	Not smoking	35.2	0.78	20
186	Segambut	Female	Malay	40	Tertiary	Working	8000	20	No	6.7	No	113	77	No	Not smoking	31.6	1.05	10
189	Segambut	Female	Malay	37	Tertiary	Working	8000	36	No	4.9	No	121	81	No	Not smoking	18.7	0.41	20
190	Segambut	Female	Malay	33	Tertiary	Working	4300	9	No	4.9	No	105	74	No	Not smoking	19.7	0.44	100
191	Segambut	Female	Malay	40	Tertiary	Working	15000	20	No	5.9	No	114	69	No	Not smoking	21.8	0.19	20
195	Segambut	Female	Malay	21	Tertiary	Working	2500	20	No	5.4	No	112	79	No	Not smoking	19.7	0.55	20
200	Segambut	Female	Malay	31	Tertiary	Working	4200	25	No	6	No	120	80	No	Not smoking	20	0.56	10
033	Segambut	Male	Indian	21	Secondary	Not working	1200	19	No	5	No	92	60	No	Not smoking	18	0.38	20
215	Batu	Female	Indian	42	Secondary	Not working	2000	19	No	4.3	No	105	67	No	Not smoking	21.1	1.2	10
239	Batu	Female	Indian	47	Secondary	Not working	5000	40	No	8.8	No	125	70	No	Not smoking	20.9	0.03	20
045	Kepong	Male	Malay	41	Secondary	Not working	5000	20	No	6	No	128	85	No	Not smoking	29.4	0.64	20
205	Batu	Female	Malay	64	Secondary	Not working	1500	40	No	5.2	No	135	71	No	Not smoking	24.7	1.64	1500
028	Segambut	Female	Malay	51	Secondary	Not working	1500	38	No	6.6	No	116	77	No	Not smoking	26.4	2.86	26.67
069	Segambut	Female	Malay	68	Secondary	Not working	1200	41	No	6.3	No	130	70	No	Not smoking	29	2.03	80
081	Segambut	Female	Malay	44	Secondary	Not working	2150	15	No	4.8	No	97	71	No	Not smoking	20.1	2.17	26.67
105	Segambut	Female	Malay	56	Secondary	Not working	2500	20	No	8.1	No	112	81	No	Not smoking	34.6	1.56	40
233	Batu	Female	Indian	43	Primary	Not working	1350	42	No	5.5	No	130	70	No	Not smoking	28	1.65	20
030	Segambut	Female	Malay	42	Primary	Not working	1600	20	No	5.4	No	100	67	No	Not smoking	27.1	1.03	15
048	Kepong	Male	Chinese	24	Tertiary	Not working	3500	5	No	5.4	No	122	72	No	Not smoking	22.9	0.57	15
050	Kepong	Male	Chinese	24	Tertiary	Not working	10000	5	No	5.1	No	126	66	No	Not smoking	25.2	0.84	10
052	Kepong	Male	Chinese	24	Tertiary	Not working	4000	5	No	5.3	No	119	69	No	Not smoking	24.8	0.43	20
056	Kepong	Male	Chinese	24	Tertiary	Not working	3000	23	No	6.3	No	127	72	No	Not smoking	23.2	0.9	10
057	Kepong	Female	Chinese	24	Tertiary	Not working	4000	5	No	4.7	No	111	68	No	Not smoking	20.3	0.59	20
058	Kepong	Female	Chinese	24	Tertiary	Not working	7000	6	No	5	No	107	71	No	Not smoking	22.2	0.79	10
160	Segambut	Female	Indian	23	Tertiary	Not working	2200	20	No	5.4	No	118	89	No	Not smoking	29	1.18	15
162	Segambut	Female	Indian	20	Tertiary	Not working	3000	19	No	6	No	132	61	No	Not smoking	25.7	0.65	20
049	Kepong	Male	Others	24	Tertiary	Not working	3000	23	No	5.5	No	124	66	No	Not smoking	30.5	0.6	20
133	Batu	Male	Malay	62	Tertiary	Not working	15000	30	No	7.2	No	114	85	No	Not smoking	25.6	1.37	80
167	Segambut	Male	Malay	66	Tertiary	Not working	1100	19	No	3.9	No	135	78	No	Not smoking	28.7	1.87	50
170	Segambut	Male	Malay	20	Tertiary	Not working	5000	14	No	5.4	No	135	88	No	Not smoking	22.9	0.94	10
181	Segambut	Male	Malay	22	Tertiary	Not working	5000	21	No	5.2	No	114	89	No	Not smoking	35.9	0.61	20
131	Batu	Female	Malay	58	Tertiary	Not working	2000	38	No	6.4	No	110	71	No	Not smoking	27.3	1.36	30
217	Batu	Female	Malay	22	Tertiary	Not working	10000	21	No	5.9	No	112	74	No	Not smoking	17.5	0.04	20
218	Batu	Female	Malay	25	Tertiary	Not working	10000	24	No	6	No	117	75	No	Not smoking	21.5	0.1	20
054	Kepong	Female	Malay	24	Tertiary	Not working	10000	23	No	4.6	No	119	77	No	Not smoking	18.7	1.12	15
055	Kepong	Female	Malay	55	Tertiary	Not working	2000	10	No	5.2	No	128	80	No	Not smoking	18.6	1.8	80
078	Segambut	Female	Malay	43	Tertiary	Not working	4000	43	No	5.6	No	105	77	No	Not smoking	22.3	1.31	40
163	Segambut	Female	Malay	43	Tertiary	Not working	3000	31	No	4.9	No	109	72	No	Not smoking	27.8	1.72	15
184	Segambut	Female	Malay	33	Tertiary	Not working	2000	20	No	6.5	No	115	80	No	Not smoking	31.6	1.49	26.67
187	Segambut	Female	Malay	18	Tertiary	Not working	5000	5	No	4.4	No	130	82	No	Not smoking	27.6	0.33	20
188	Segambut	Female	Malay	19	Tertiary	Not working	2000	5	No	5.7	No	113	75	No	Not smoking	16.8	0.52	20
193	Segambut	Female	Malay	23	Tertiary	Not working	2000	20	No	5.3	No	121	71	No	Not smoking	26.4	1.11	15
197	Segambut	Female	Malay	23	Tertiary	Not working	5350	22	No	5.2	No	120	78	No	Not smoking	16.9	0.4	20
198	Segambut	Female	Malay	23	Tertiary	Not working	2000	22	No	5.2	No	112	72	No	Not smoking	26	0.83	20
199	Segambut	Female	Malay	20	Tertiary	Not working	5000	19	No	5.5	No	106	66	No	Not smoking	16.8	0.35	20
036	Segambut	Male	Malay	54	Secondary	Working	1250	30	Yes	11.1	No	127	74	No	Not smoking	24.7	0.78	15
203	Batu	Female	Malay	39	Secondary	Working	1300	35	Yes	16.2	No	107	75	No	Not smoking	34	0.72	150
106	Segambut	Male	Malay	38	Tertiary	Working	7000	29	Yes	11.5	No	124	76	No	Not smoking	27	1.3	10
140	Batu	Female	Malay	66	Tertiary	Working	1500	30	Yes	8.1	No	133	78	No	Not smoking	22.3	2.89	40
034	Segambut	Male	Others	54	Secondary	Working	3000	55	No	8.7	Yes	130	90	No	Not smoking	30	0.63	5
130	Batu	Male	Malay	52	Secondary	Working	1300	10	No	8.2	Yes	141	87	No	Not smoking	23.7	1.62	80
040	Kepong	Male	Malay	58	Secondary	Working	2000	20	No	8.7	Yes	131	89	No	Not smoking	27.6	1.88	80
024	Segambut	Male	Malay	63	Secondary	Working	4000	63	No	6.2	Yes	140	80	No	Not smoking	28.4	0.84	10
062	Segambut	Male	Malay	35	Secondary	Working	5000	10	No	7.9	Yes	130	100	No	Not smoking	33.2	0.99	80
234	Batu	Female	Malay	43	Secondary	Working	1100	40	No	5	Yes	142	91	No	Not smoking	29.1	4.13	20
004	Kepong	Female	Malay	40	Secondary	Working	7000	15	No	6.4	Yes	97	63	No	Not smoking	24.7	0.31	10
072	Segambut	Female	Malay	53	Secondary	Working	5000	35	No	7.7	Yes	148	80	No	Not smoking	26.3	1.01	30
092	Segambut	Female	Indian	60	Primary	Working	700	28	No	7.5	Yes	128	78	No	Not smoking	31.9	4.29	30
093	Segambut	Female	Indian	65	Primary	Working	1000	25	No	9.5	Yes	116	71	No	Not smoking	28.6	7.24	26.67
099	Segambut	Male	Chinese	55	Tertiary	Working	1000	30	No	6.5	Yes	130	96	No	Not smoking	30.8	1.17	40
237	Batu	Female	Chinese	45	Tertiary	Working	1500	25	No	9.1	Yes	140	85	No	Not smoking	24	1.8	20
123	Batu	Male	Malay	63	Tertiary	Working	4000	30	No	6.6	Yes	128	91	No	Not smoking	24	0.34	20
136	Batu	Male	Malay	35	Tertiary	Working	9300	9	No	4.9	Yes	128	91	No	Not smoking	33.2	1.16	150
139	Batu	Male	Malay	50	Tertiary	Working	5500	25	No	7.1	Yes	140	80	No	Not smoking	27.4	1.06	15
146	Batu	Male	Malay	39	Tertiary	Working	12000	20	No	6	Yes	123	90	No	Not smoking	23.9	0.77	20
154	Batu	Male	Malay	50	Tertiary	Working	8000	26	No	6.2	Yes	146	90	No	Not smoking	24.2	0.64	5
012	Kepong	Male	Malay	45	Tertiary	Working	1200	18	No	6.7	Yes	137	98	No	Not smoking	22.3	1.58	26.67
224	Kepong	Male	Malay	56	Tertiary	Working	3800	30	No	8.2	Yes	142	85	No	Not smoking	38.9	1.06	15
027	Segambut	Male	Malay	45	Tertiary	Working	10000	40	No	5	Yes	130	80	No	Not smoking	28.5	0.21	26.67
156	Segambut	Female	Malay	55	Tertiary	Working	3500	38	No	5	Yes	134	93	No	Not smoking	22	1.66	15
159	Segambut	Female	Malay	34	Tertiary	Working	9500	10	No	5.8	Yes	131	96	No	Not smoking	29.7	0.49	20
166	Segambut	Female	Malay	42	Tertiary	Working	10000	15	No	5.9	Yes	135	92	No	Not smoking	25.2	1.11	5
168	Segambut	Female	Malay	38	Tertiary	Working	5000	37	No	4.9	Yes	139	98	No	Not smoking	28.3	1.13	20
192	Segambut	Female	Malay	49	Tertiary	Working	12000	20	No	4.8	Yes	155	107	No	Not smoking	27.7	0.78	20
232	Batu	Female	Chinese	41	Secondary	Not working	1300	32	No	6.1	Yes	129	90	No	Not smoking	20	1.59	20
067	Segambut	Female	Chinese	63	Secondary	Not working	6000	44	No	10.1	Yes	144	82	No	Not smoking	25.8	0.85	20
044	Kepong	Male	Malay	62	Secondary	Not working	1500	62	No	5.5	Yes	141	95	No	Not smoking	22.5	0.74	60
071	Segambut	Male	Malay	74	Secondary	Not working	1300	50	No	8.2	Yes	123	71	No	Not smoking	23.5	0.85	30
077	Segambut	Male	Malay	58	Secondary	Not working	1000	50	No	7.2	Yes	156	101	No	Not smoking	26.8	1.38	80
119	Batu	Female	Malay	59	Secondary	Not working	4000	43	No	8.2	Yes	111	70	No	Not smoking	26	0.4	20
122	Batu	Female	Malay	59	Secondary	Not working	4500	59	No	6.2	Yes	145	93	No	Not smoking	30.4	0.44	20
126	Batu	Female	Malay	57	Secondary	Not working	1500	20	No	5.8	Yes	148	94	No	Not smoking	24.4	0.66	20
132	Batu	Female	Malay	60	Secondary	Not working	2000	30	No	4.7	Yes	145	97	No	Not smoking	34.1	3.24	30
076	Segambut	Female	Malay	56	Secondary	Not working	1000	35	No	5.5	Yes	156	98	No	Not smoking	31.2	1.9	300
124	Batu	Male	Malay	63	Tertiary	Not working	6000	40	No	5.2	Yes	148	88	No	Not smoking	30.4	0.49	10
018	Kepong	Male	Malay	33	Tertiary	Not working	10000	30	No	6.3	Yes	137	90	No	Not smoking	38.1	0.76	60
107	Segambut	Male	Malay	61	Tertiary	Not working	6000	10	No	7.3	Yes	145	88	No	Not smoking	26.6	0.54	20
206	Batu	Female	Malay	53	Secondary	Not working	1000	40	Yes	18.8	Yes	128	68	No	Not smoking	44.9	1.42	150
066	Segambut	Female	Malay	64	Secondary	Not working	1050	20	Yes	6.3	Yes	140	89	No	Not smoking	24.7	1.35	300
120	Batu	Female	Malay	61	Tertiary	Not working	5000	40	Yes	10.2	Yes	140	85	No	Not smoking	34.9	0.95	20
231	Batu	Female	Malay	41	Secondary	Not working	1200	30	No	6.3	No	125	70	Yes	Not smoking	19.3	1.55	20
235	Batu	Female	Malay	43	Secondary	Working	1500	20	Yes	12	No	115	70	Yes	Not smoking	26.7	1.7	20
207	Batu	Female	Malay	48	Secondary	Not working	1200	30	No	6.1	Yes	143	88	Yes	Not smoking	31.3	3.43	40
068	Segambut	Female	Malay	59	Primary	Not working	1150	34	Yes	7	Yes	128	82	Yes	Not smoking	29.3	1.25	15
096	Segambut	Female	Chinese	32	Secondary	Working	600	10	No	5.3	No	103	80	No	Smoking	16.4	1.25	80
134	Batu	Male	Malay	50	Secondary	Working	3000	40	No	6.8	No	128	84	No	Smoking	32.4	1.36	15
135	Batu	Male	Malay	59	Secondary	Working	1100	20	No	6.2	No	117	70	No	Smoking	20.3	1.51	60
137	Batu	Male	Malay	59	Secondary	Working	1500	38	No	5.2	No	122	78	No	Smoking	20.7	1.3	20
138	Batu	Male	Malay	25	Secondary	Working	1250	20	No	6.2	No	111	74	No	Smoking	16.5	1.38	30
145	Batu	Male	Malay	44	Secondary	Working	1000	20	No	6.9	No	139	76	No	Smoking	30.7	2.48	10
148	Batu	Male	Malay	38	Secondary	Working	6000	15	No	5.3	No	138	83	No	Smoking	29.5	0.47	20
211	Batu	Male	Malay	50	Secondary	Working	5000	30	No	7.7	No	108	57	No	Smoking	32.9	0.48	20
214	Batu	Male	Malay	53	Secondary	Working	7000	30	No	5.1	No	117	80	No	Smoking	24.9	0.21	5
016	Kepong	Male	Malay	29	Secondary	Working	3500	25	No	5.7	No	132	68	No	Smoking	28.7	0.66	10
017	Kepong	Male	Malay	18	Secondary	Working	1000	18	No	5.6	No	113	86	No	Smoking	44.8	0.25	10
019	Kepong	Male	Malay	27	Secondary	Working	1500	10	No	5	No	130	80	No	Smoking	39.4	0.29	10
043	Kepong	Male	Malay	37	Secondary	Working	8000	10	No	5.8	No	130	80	No	Smoking	44.5	1.16	40
047	Kepong	Male	Malay	30	Secondary	Working	2000	8	No	5.8	No	130	84	No	Smoking	30.7	0.82	15
051	Kepong	Male	Malay	35	Secondary	Working	2000	34	No	6.5	No	109	76	No	Smoking	22.3	0.91	15
025	Segambut	Male	Malay	41	Secondary	Working	2500	39	No	5.8	No	121	77	No	Smoking	33.3	1.05	15
029	Segambut	Male	Malay	25	Secondary	Working	2400	15	No	5.8	No	105	69	No	Smoking	18.7	0.12	10
060	Segambut	Male	Malay	32	Secondary	Working	2500	31	No	5.3	No	103	71	No	Smoking	20.4	0.9	15
065	Segambut	Male	Malay	39	Secondary	Working	4000	30	No	10	No	126	85	No	Smoking	26.7	0.6	10
109	Segambut	Male	Malay	65	Secondary	Working	3500	40	No	8.9	No	130	80	No	Smoking	26.1	2.13	40
112	Segambut	Male	Malay	54	Secondary	Working	5500	32	No	5.5	No	134	87	No	Smoking	28.7	0.55	10
113	Segambut	Male	Malay	55	Secondary	Working	4000	30	No	5.3	No	132	70	No	Smoking	22.5	4.18	5
114	Segambut	Male	Malay	44	Secondary	Working	2000	20	No	6.4	No	130	80	No	Smoking	19.5	2.02	40
115	Segambut	Male	Malay	53	Secondary	Working	7000	30	No	9.4	No	108	78	No	Smoking	20.7	0.92	20
201	Batu	Female	Malay	28	Secondary	Working	3000	27	No	5.3	No	112	73	No	Smoking	21.8	1.56	10
213	Batu	Female	Malay	37	Secondary	Working	3000	17	No	4.8	No	111	73	No	Smoking	26.6	0.88	20
026	Segambut	Female	Malay	34	Secondary	Working	4000	33	No	5.2	No	90	70	No	Smoking	22.6	2.64	15
094	Segambut	Female	Malay	42	Secondary	Working	3200	41	No	6.2	No	119	82	No	Smoking	25.5	1.09	15
104	Segambut	Female	Malay	35	Secondary	Working	3000	27	No	5.7	No	102	71	No	Smoking	20.3	1.2	30
084	Segambut	Male	Malay	38	Primary	Working	1350	20	No	7.7	No	125	81	No	Smoking	22.9	0.98	15
116	Segambut	Male	Malay	53	Primary	Working	3000	20	No	5.9	No	127	74	No	Smoking	25.3	1.11	20
143	Batu	Male	Malay	28	Tertiary	Working	6000	9	No	7.3	No	135	72	No	Smoking	22.1	0.75	5
147	Batu	Male	Malay	32	Tertiary	Working	4000	9	No	6.2	No	126	77	No	Smoking	29.3	1.07	15
149	Batu	Male	Malay	52	Tertiary	Working	3400	5	No	7.2	No	129	79	No	Smoking	28	3.09	15
150	Batu	Male	Malay	31	Tertiary	Working	3500	30	No	10.5	No	112	79	No	Smoking	25	1.25	40
151	Batu	Male	Malay	29	Tertiary	Working	3000	7	No	6.3	No	122	79	No	Smoking	25.6	0.55	20
152	Batu	Male	Malay	29	Tertiary	Working	2000	8	No	6.4	No	117	75	No	Smoking	31.9	1.18	30
153	Batu	Male	Malay	65	Tertiary	Working	1500	20	No	7.3	No	134	77	No	Smoking	27.3	1.71	10
155	Batu	Male	Malay	37	Tertiary	Working	2000	7	No	5	No	118	82	No	Smoking	24.6	0.99	15
219	Batu	Male	Malay	27	Tertiary	Working	15000	26	No	6.8	No	114	78	No	Smoking	27.4	0.3	20
005	Kepong	Male	Malay	30	Tertiary	Working	3607	7	No	4.2	No	137	82	No	Smoking	32	0.81	15
006	Kepong	Male	Malay	34	Tertiary	Working	2500	7	No	6.2	No	100	60	No	Smoking	21	0.63	75
007	Kepong	Male	Malay	33	Tertiary	Working	5000	32	No	6.2	No	119	76	No	Smoking	27.8	0.3	10
008	Kepong	Male	Malay	26	Tertiary	Working	7000	8	No	6.5	No	127	81	No	Smoking	31.9	0.66	10
009	Kepong	Male	Malay	38	Tertiary	Working	8000	14	No	4.4	No	120	80	No	Smoking	28.1	0.43	60
010	Kepong	Male	Malay	31	Tertiary	Working	2000	5	No	6.9	No	111	78	No	Smoking	25.4	0.59	15
011	Kepong	Male	Malay	37	Tertiary	Working	4000	36	No	5.4	No	117	76	No	Smoking	27.6	0.81	15
014	Kepong	Male	Malay	26	Tertiary	Working	9000	8	No	5.2	No	126	77	No	Smoking	16.4	0.24	10
022	Kepong	Male	Malay	52	Tertiary	Working	10000	18	No	8.7	No	119	85	No	Smoking	26.4	1.91	800
039	Kepong	Male	Malay	28	Tertiary	Working	4000	20	No	5.9	No	135	85	No	Smoking	25.4	0.29	20
041	Kepong	Male	Malay	29	Tertiary	Working	6000	16	No	5.5	No	129	83	No	Smoking	24.5	1.01	20
042	Kepong	Male	Malay	33	Tertiary	Working	9000	31	No	5.2	No	133	87	No	Smoking	25.6	0.67	15
046	Kepong	Male	Malay	32	Tertiary	Working	4000	23	No	5.3	No	123	81	No	Smoking	27.2	0.64	15
222	Kepong	Male	Malay	37	Tertiary	Working	4500	36	No	5.6	No	106	72	No	Smoking	28.1	0.26	10
223	Kepong	Male	Malay	52	Tertiary	Working	2000	12	No	4.8	No	117	79	No	Smoking	29.2	0.13	20
226	Kepong	Male	Malay	31	Tertiary	Working	2000	5	No	5	No	100	60	No	Smoking	20.7	0.05	20
227	Kepong	Male	Malay	31	Tertiary	Working	5000	22	No	6.4	No	123	80	No	Smoking	22.4	0.63	20
229	Kepong	Male	Malay	27	Tertiary	Working	2615	9	No	4.7	No	129	74	No	Smoking	29.4	0.19	20
023	Segambut	Male	Malay	53	Tertiary	Working	5000	10	No	6.3	No	120	70	No	Smoking	27.7	1.4	10
082	Segambut	Male	Malay	39	Tertiary	Working	1200	12	No	7.8	No	121	87	No	Smoking	23	2	26.67
100	Segambut	Male	Malay	31	Tertiary	Working	3500	9	No	6.3	No	136	85	No	Smoking	30	0.79	10
110	Segambut	Male	Malay	29	Tertiary	Working	3500	28	No	4.7	No	138	75	No	Smoking	22.6	0.58	20
161	Segambut	Male	Malay	34	Tertiary	Working	4000	33	No	6.2	No	118	67	No	Smoking	22.2	1.09	20
037	Segambut	Female	Malay	38	Tertiary	Working	2500	37	No	6.3	No	102	70	No	Smoking	20.1	0.62	5
174	Segambut	Female	Malay	22	Tertiary	Working	1600	21	No	5.6	No	105	76	No	Smoking	32.1	1.13	15
204	Batu	Female	Indian	45	Secondary	Not working	5000	20	No	5.1	No	113	63	No	Smoking	29.1	1.55	30
064	Segambut	Female	Indian	39	Secondary	Not working	2800	7	No	5	No	108	75	No	Smoking	19.2	0.6	20
089	Segambut	Female	Indian	39	Secondary	Not working	2000	20	No	6	No	99	72	No	Smoking	23.9	1.2	40
091	Segambut	Male	Malay	67	Secondary	Not working	2000	50	No	4.9	No	116	89	No	Smoking	29.3	1.18	15
117	Segambut	Male	Malay	69	Secondary	Not working	1350	40	No	5.2	No	137	78	No	Smoking	29	1.54	40
202	Batu	Female	Malay	43	Secondary	Not working	2000	10	No	4.8	No	114	76	No	Smoking	27.8	2.6	15
212	Batu	Female	Malay	48	Secondary	Not working	5000	20	No	5.4	No	138	81	No	Smoking	26.4	5.83	20
101	Segambut	Female	Malay	48	Secondary	Not working	1700	30	No	7.4	No	116	69	No	Smoking	22.7	1.01	15
103	Segambut	Female	Malay	51	Secondary	Not working	3000	21	No	7.1	No	129	88	No	Smoking	36.5	0.82	80
164	Segambut	Male	Malay	55	Tertiary	Not working	1000	18	No	5.1	No	95	63	No	Smoking	19.4	1.56	75
182	Segambut	Male	Malay	26	Tertiary	Not working	2500	13	No	6.5	No	124	86	No	Smoking	19.5	1.26	10
073	Segambut	Female	Malay	19	Tertiary	Not working	1200	18	No	5	No	101	70	No	Smoking	20.7	0.68	10
185	Segambut	Female	Malay	18	Tertiary	Not working	2500	18	No	6.8	No	101	68	No	Smoking	15.6	0.26	20
194	Segambut	Female	Malay	20	Tertiary	Not working	7000	19	No	6.9	No	109	78	No	Smoking	18.3	0.98	20
196	Segambut	Female	Malay	28	Tertiary	Not working	1200	19	No	6.3	No	106	76	No	Smoking	24.5	1.07	15
216	Batu	Male	Malay	35	Secondary	Working	6000	34	No	6.3	Yes	142	73	No	Smoking	41.5	1.3	50
080	Segambut	Male	Malay	31	Secondary	Working	1325	25	No	7.7	Yes	152	86	No	Smoking	31.9	0.69	15
111	Segambut	Male	Malay	43	Secondary	Working	1000	28	No	5.2	Yes	133	91	No	Smoking	34.7	1.74	15
087	Segambut	Female	Indian	42	Primary	Working	2000	10	No	7	Yes	122	92	No	Smoking	28.1	0.95	20
061	Segambut	Male	Malay	41	Tertiary	Working	6000	20	No	6.2	Yes	158	110	No	Smoking	39.7	1.09	26.67
108	Segambut	Male	Malay	40	Tertiary	Working	2000	9	No	7.2	Yes	159	93	No	Smoking	36.9	1.19	40
083	Segambut	Female	Indian	58	Secondary	Not working	1200	15	No	8.5	Yes	168	95	No	Smoking	28.9	1.09	75
125	Batu	Female	Malay	60	Secondary	Not working	1500	30	No	5.8	Yes	144	88	No	Smoking	29.6	1.45	30
074	Segambut	Female	Malay	39	Secondary	Not working	1800	19	No	5.8	Yes	129	96	No	Smoking	31.6	0.92	15
090	Segambut	Female	Malay	63	Primary	Not working	885	42	No	6.8	Yes	141	82	No	Smoking	28.6	1.43	80
183	Segambut	Male	Malay	19	Tertiary	Not working	5500	5	No	4.9	Yes	142	76	No	Smoking	25	0.48	20
129	Batu	Female	Malay	63	Tertiary	Not working	4500	15	No	5.5	Yes	148	79	No	Smoking	26.2	1.14	20
095	Segambut	Male	Malay	51	Secondary	Working	2000	33	Yes	11.1	Yes	162	97	No	Smoking	33.1	0.78	80
208	Batu	Male	Malay	50	Primary	Working	1200	30	Yes	15.2	Yes	123	82	No	Smoking	31.8	3.59	50
209	Batu	Male	Malay	54	Primary	Working	2000	25	Yes	17.5	Yes	140	97	No	Smoking	29.5	1.3	160
059	Segambut	Male	Malay	62	Secondary	Not working	1100	36	Yes	21.1	Yes	142	87	No	Smoking	24	1.56	160
102	Segambut	Female	Malay	48	Secondary	Not working	7000	20	Yes	15.3	Yes	125	85	No	Smoking	49.3	6.73	150
142	Batu	Male	Malay	53	Tertiary	Not working	1800	53	Yes	6.6	Yes	134	92	No	Smoking	29.4	2.26	40
020	Kepong	Female	Malay	61	Primary	Working	950	45	No	8.4	No	125	71	Yes	Smoking	27.3	1.41	80
075	Segambut	Male	Malay	64	Secondary	Not working	1500	34	No	6.1	No	125	73	Yes	Smoking	27.1	1.01	20
032	Segambut	Female	Malay	51	Secondary	Not working	6000	40	No	5.5	No	112	85	Yes	Smoking	27.6	0.8	20
240	Batu	Female	Malay	49	Secondary	Working	1250	40	No	9.5	Yes	150	90	Yes	Smoking	31.6	6.8	10
230	Batu	Female	Malay	41	Secondary	Not working	1100	25	No	5.9	Yes	145	95	Yes	Smoking	26.7	3.2	26.67
238	Batu	Female	Indian	47	Tertiary	Working	1500	30	Yes	11.7	Yes	135	90	Yes	Smoking	25.3	5.21	15
